# Supplementary material for: Development and validation of the health belief model questionnaire to promote smoking cessation for nasopharyngeal cancer prevention: a cross-sectional study
Source: PubMed Central journal article supplement — BMJ Open. 2022 Sep 14;12(9):e057552. doi: 10.1136/bmjopen-2021-057552 (PMC9476129; doi:10.1136/bmjopen-2021-057552), 2022-09-14
Supplement: bmjopen-2021-057552supp001.pdf [file bmjopen-2021-057552supp001.pdf]

### **Supplementary: Questionnaire to promote smoking cessation for nasopharyngeal cancer prevention**

\*Questionnaire was distributed in Malay version on a 5-point Likert Scale (strongly disagree, disagree, neutral, agree, and strongly agree). English version is shown in *Italic* form.

#### **Bahagian 1: Persepsi terhadap kanser hidung dan tekak. Section 1: Perceptions towards nose and throat cancer**

##### **Kepercayaan kepada tiada daya tahan/ *Perceived Susceptibility***

1. Saya merasakan bahawa saya akan mendapat kanser pangkal hidung pada masa akan datang.  
*1. I feel that I will get nose and throat cancer in the future.*
2. Peluang saya mendapat kanser pangkal hidung adalah tinggi.  
*2. My chances of getting nose and throat cancer are high.*
3. Saya tidak dapat mengelakkan diri daripada mendapat kanser pangkal hidung.  
*3. I cannot avoid myself from getting nose and throat cancer.*
4. Saya bimbang terkena kanser pangkal hidung kerana ahli keluarga saya menghadapi masalah ini.  
*4. I am worried about getting nose and throat cancer due to family history.*
5. Tabiat merokok saya menyebabkansaya lebih berisiko menghidap kanser pangkal hidung.  
*5. My smoking habit makes me more likely than average to get nose and throat cancer.*

##### **Kepercayaan kepada bahaya/ *Perceived seriousness***

6. Risiko dan kesan- kesan kanser pangkal hidung menakutkan saya.  
*6. The thought of nose seriousness and throat cancer scares me.*
7. Jika saya mempunyai kanser pangkal hidung, kos rawatan akan menjadi beban kewangan keluarga saya.  
*7. If I had nose and throat cancer, the cost of treatment can be a financial strain.*
8. Kanser pangkal hidung akan merosakkan hubungan antara ahli keluarga saya.  
*8. Nose and throat cancer would threaten a relationship with my family.*
9. Jika saya mempunyai kanser pangkal hidung, kehidupan saya akan berubah.  
*9. If I had nose and throat cancer my whole life would change.*
10. Jika saya mempunyai kanser pangkal hidung, saya tidak akan hidup lama.  
*10. If I developed nose and throat cancer, I would not live long.*

**Kepercayaan kepada manfaat/ *Perceived benefits***

11. Berhenti merokok akan mengurangkan peluang saya mendapat kanser pangkal hidung.

11. *Quit smoking decreases my chance of getting nose and throat cancer.*

12. Berhenti merokok akan mengurangkan risiko kematian disebabkan kanser pangkal hidung.

12. *Quit smoking decreases my chance of dying from nose and throat cancer.*

13. Berhenti merokok amat penting untuk meningkatkan kesihatan saya.

13. *Quit smoking can improve my health.*

14. Berhenti merokok akan mengurangkan kerisauan saya terhadap kanser pangkal hidung.

14. *I feel less anxious about nose and throat cancer if I quit smoking.*

**Kepercayaan kepada halangan/ *Perceived barriers***

15. Saya berasa sukar untuk menghentikan tabiat merokok atas sebab tekanan rakan sebaya dan lain-lain.

15. *It is difficult to quit tobacco smoking (e.g., peer pressure).*

16. Saya akan berasa bimbang akan sesuatu tanpa merokok.

16. *I feel anxious without smoking.*

17. Merokok menghilangkan tekanan saya.

17. *Tobacco smoking relieves my stress.*

18. Jika saya tidak merokok, saya akan mengalami sakit kepala.

18. *I experience headache without smoking.*

19. Jika saya tidak merokok, saya akan mengalami air liur berlebihan.

19. *I experience excessive salivation without smoking.*

20. Saya rasa mendapat kanser pangkal hidung adalah takdir dan berhenti merokok tidak akan mengubahnya.

20. *I think getting nose and throat cancer is destiny and quitting smoking will not change it.*

**Isyarat untuk bertindak/ *Cues to action***

21. Jika saya mempunyai sokongan sosial, saya akan berhenti merokok.

21. *I will quit smoking if I have social support.*

22. Jika beberapa sumber maklumat mengingatkan saya, saya akan berhenti merokok. (Contoh sumber maklumat termasuk: internet, surat khabar, radio dan TV).

22. *I will quit smoking if there are information sources that reminds me. (Examples of sources include: the internet, newspapers, radio and TV).*

23. Saya akan berhenti merokok sekiranya saya mempunyai kemahuan untuk berubah.

23. *I will quit smoking if I have the will to change.*

24. Menyedari bahaya merokok akan membantu saya berhenti merokok.

24. *I will quit smoking if I know the diseases related to smoking.*

25. Saya akan berhenti merokok sekiranya ahli profesional kesihatan membantu saya.  
*25. I will quit smoking if there are health professionals to assist me.*

#### **Keberkesanan diri/ Self-efficacy**

26. Saya boleh menolak merokok apabila saya ingin memikirkan masalah yang sukar.  
*26. I can refuse to smoke when I am thinking about difficult problem.*
27. Saya boleh menolak merokok apabila saya mempunyai keinginan untuk merokok.  
*27. I can refuse the urge to smoke.*
28. Saya boleh menolak merokok apabila saya melihat orang lain merokok.  
*28. I can refuse to smoke when I see someone else smoking.*
29. Saya boleh menolak merokok apabila kawan/ keluarga saya mengajak saya untuk merokok.  
*29. I can refuse to smoke when offered by my friends/ family.*
30. Saya boleh menolak membeli rokok apabila saya mempunyai lebihan wang saku.  
*30. I can refuse from buying cigarettes when I have extra pocket money.*

#### **Bahagian 2: Tingkah laku untuk berhenti merokok demi kesihatan Section 2: Health Behavioural Intention on smoking cessation**

1. Saya akan menjalani gaya hidup yang lebih sihat untuk mencegah kanser pangkal hidung.  
*1. I would like to lead a healthier lifestyle to prevent nose and throat cancer.*
2. Saya sedang berusaha untuk berhenti merokok untuk mengurangkan risiko kanser pangkal hidung pada masa ini.  
*2. I am trying to quit smoking to prevent nose and throat cancer at this time.*
3. Saya merancang untuk berhenti merokok untuk mengurangkan risiko kanser pangkal hidung dalam masa enam bulan.  
*3. I plan to quit smoking to prevent nose and throat cancer within six months.*
4. Saya ingin berhenti merokok untuk mengurangkan risiko kanser pangkal hidung tetapi tidak pernah mencuba.  
*4. I would like to quit smoking to prevent nose and throat cancer but have never really tried.*
